# Supplementary material for: ß-catenin signaling is required for RAS-driven thyroid cancer through PI3K activation
Source: PubMed Central journal article supplement (PMC5226519; doi:10.18632/oncotarget.10356), 2016-06-30
Supplement: oncotarget-07-49435-s001.pdf [file oncotarget-07-49435-s001.pdf]

## **β-catenin signaling is required for RAS-driven thyroid cancer through PI3K activation**

### Supplementary Materials

**Supplementary Table S1: Primers used for RT-QPCR**

| Gene        | Forward primer            | Reverse primer              | Size (bp) |
|-------------|---------------------------|-----------------------------|-----------|
| p21         | 5'CTTGTACCCTTGTGCCTCG3'   | 5'TTAGGGCTTCCTCTTGGAGA3'    | 149       |
| β-catenin   | 5'CCATCTGTGCTCTTCGTCACT3' | 5'GCAGTCTCATTCCAAGCCAT3'    | 691       |
| E-cadherin  | 5'AAGGGCTTGGATTTGAGGCCA3' | 5'GTGCTGTTCTTCACAGGCTC3'    | 362       |
| Slug        | 5'TGGTTGCTTCAAGGACACAT3'  | 5'GTTGCAGTGAGGGCAAAGAA3'    | 66        |
| TWIST1      | 5'CCGGAGACCTAGATGTCATTG3' | 5'ATGCAGAGGTGTGAGGATGG3'    | 234       |
| SNAIL1      | 5'ACCCACACTGGCGAGAAG3'    | 5'GAGAAGGATGTGGGGTCCTT3'    | 281       |
| ZEB1        | 5'GCTGACCAGAACAGTGTT3'    | 5'CAGAGTCATTCTGATCCTC3'     | 211       |
| Fibronectin | 5'CCCTTACAGTTCAGGGTTCC3'  | 5'TTCAAGCCTTCGTTGACAGA3'    | 164       |
| Vimentin    | 5'GACAATGCGTCTCTGGCACGT3' | 5'TCTTCTGCCTCCTGCAGGTTCTT3' | 236       |
| N-cadherin  | 5'TGCCATGACGTTTTATGGTG3'  | 5'TGGTTTGACCACGGTGACTA3'    | 199       |

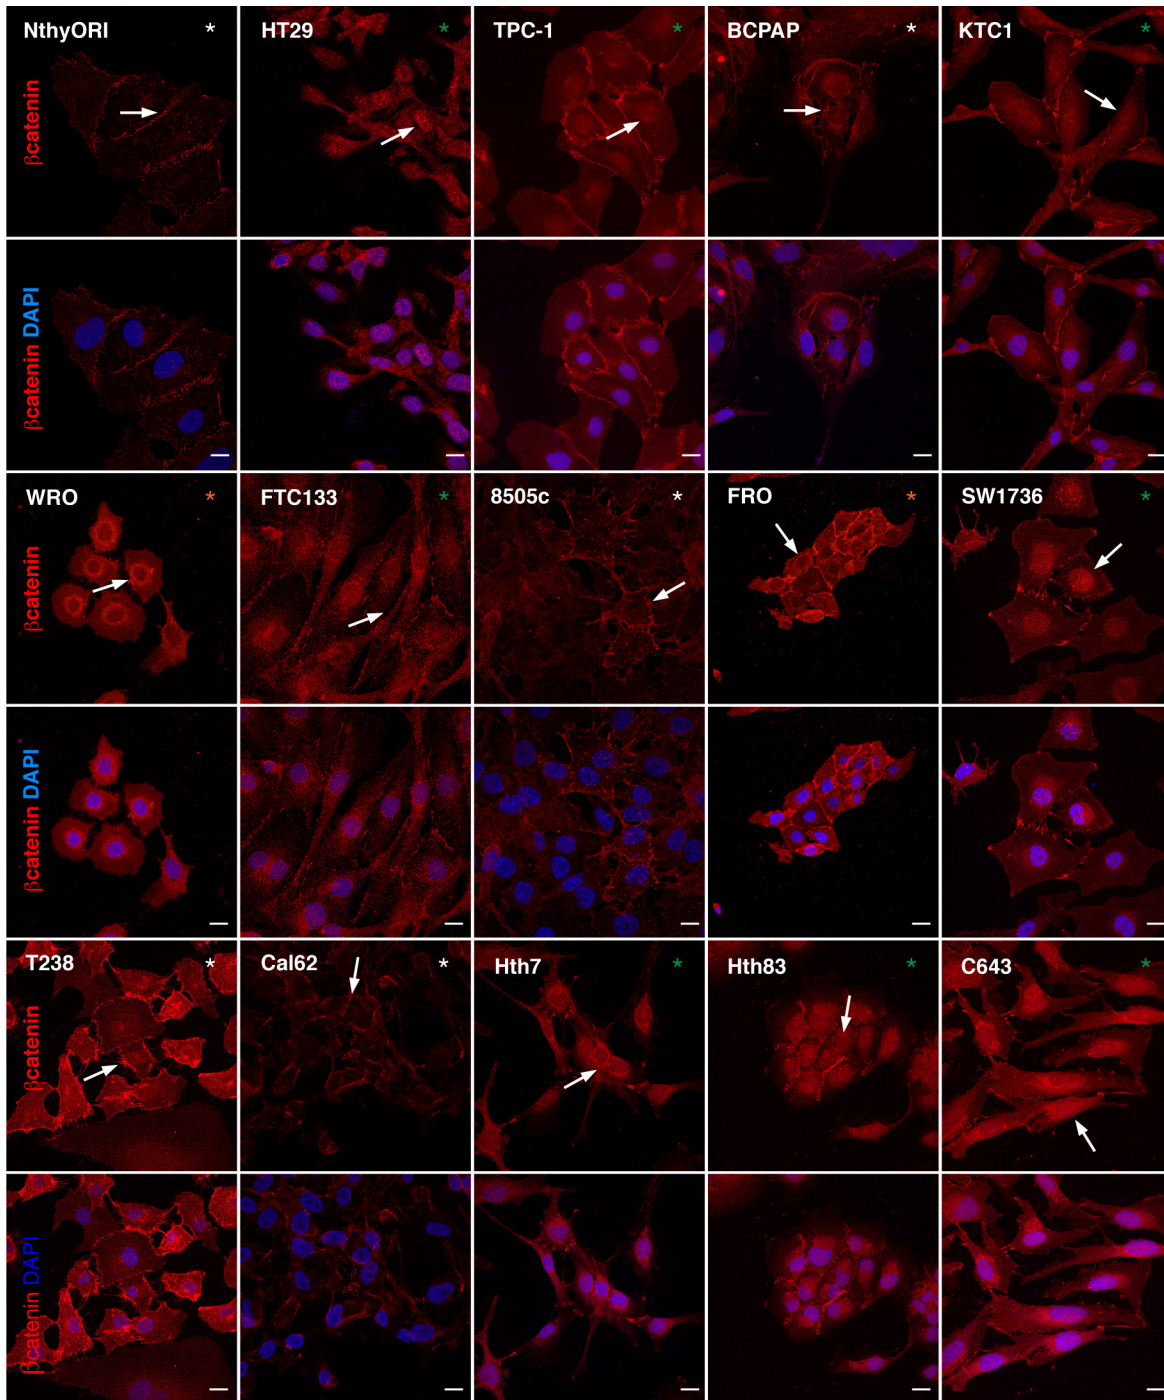

**Supplementary Figure S1:  $\beta$ -catenin cellular localization in human thyroid cancer cell lines.** Cells were grown in coverslips, fixed and stained with a  $\beta$ -catenin antibody (red). Nuclei were stained with DAPI (blue). Scale bar 10  $\mu$ m. Asterisks indicate membrane (white), perinuclear (orange) or nuclear localization (green). The arrows show representative  $\beta$ -catenin staining.
